# Supplementary material for: Enhancement of 3D Printability by FDM and Electrical Conductivity of PLA/MWCNT Filaments Using Lignin as Bio-Dispersant
Source: MDPI journal article supplement (doi:10.3390/polym15040999), 2023-02-17
Supplement: s1 [file s1]

## Solvent optimization study

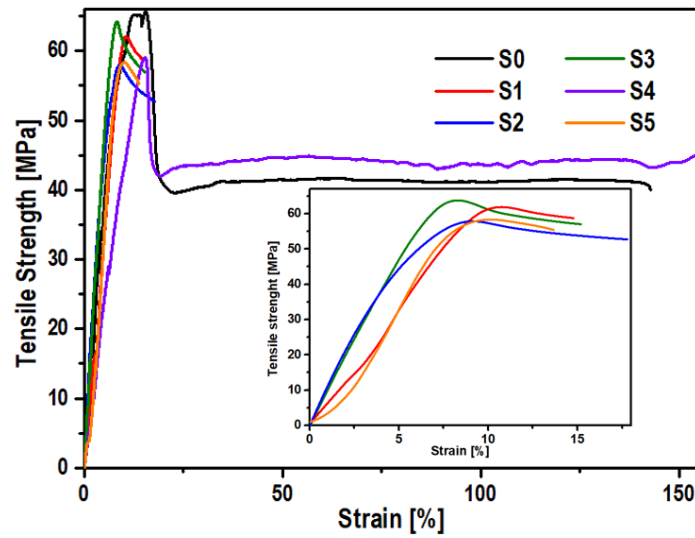

Figure S1.- Stress-strain curves obtained from tensile tests. Samples involved in the solvent optimization study. Inset image: plot amplification with the strain between 0 and 20% to see the differences.

## Optimization of MWCNT content

| $w$<br>[rad·s <sup>-1</sup> ] | $\eta^*$ [Pa s]    |                    |                    |                    |                    |                    |
|-------------------------------|--------------------|--------------------|--------------------|--------------------|--------------------|--------------------|
|                               | PLA                | P2C                | P4C                | P6C                | P8C                | P10C               |
| 0.1                           | $1.08 \times 10^2$ | $5.63 \times 10^4$ | $3.17 \times 10^5$ | $2.30 \times 10^6$ | $3.77 \times 10^6$ | $4.69 \times 10^6$ |
| 1                             | $1.51 \times 10^2$ | $5.94 \times 10^3$ | $3.60 \times 10^4$ | $2.64 \times 10^5$ | $3.90 \times 10^5$ | $4.86 \times 10^5$ |
| 10                            | $1.47 \times 10^2$ | $8.63 \times 10^2$ | $4.29 \times 10^3$ | $2.91 \times 10^4$ | $4.36 \times 10^4$ | $5.49 \times 10^4$ |
| 100                           | $7.48 \times 10^1$ | $2.37 \times 10^2$ | $7.07 \times 10^2$ | $3.28 \times 10^3$ | $5.01 \times 10^3$ | $6.67 \times 10^3$ |

Table S1.-Complex viscosity of several PLA/MWCNT composites with different amounts of nanofiller measured at different frequencies. PLA is an injected PLA sample for reference.

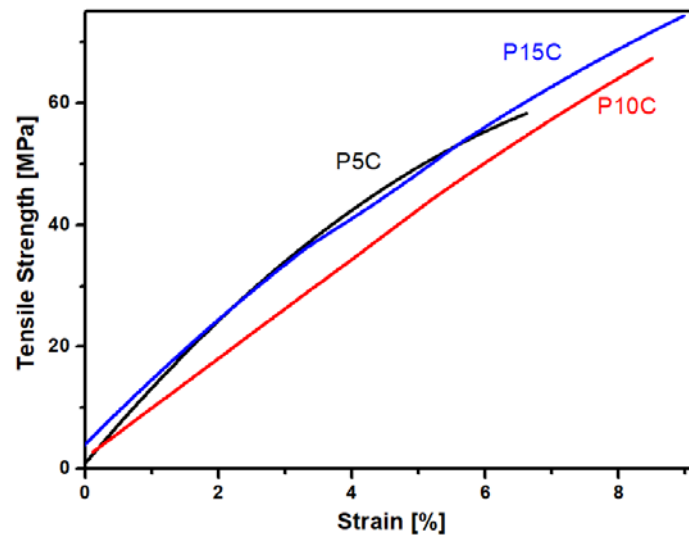

Figure S2.- Stress-strain curves obtained from representative samples of tensile tests of PLA/MWCNT composites without additives.

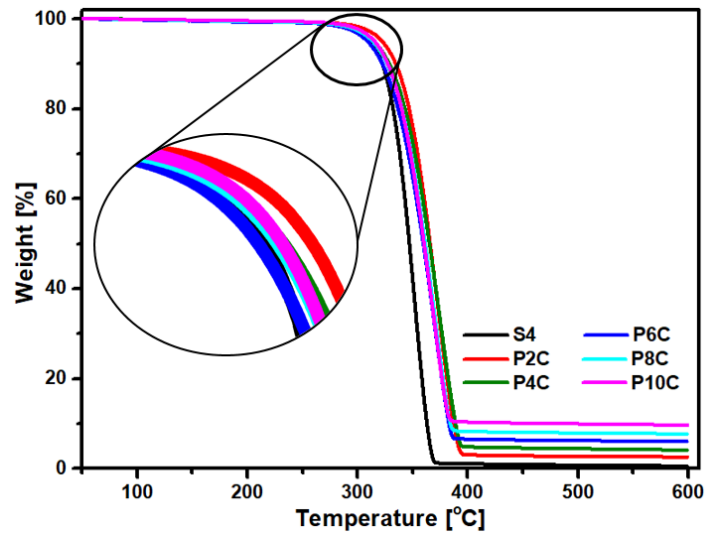

Figure S3-TGA thermograms of several PLA/MWCNT samples and S4 reference sample.

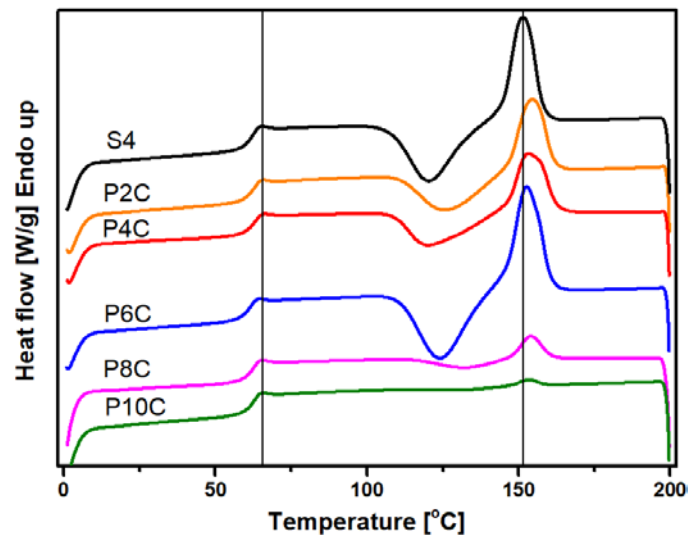

Figure S4.-DSC thermograms of MWCNT/PLA composites without PEG and S4 reference sample.

| Sample | T <sub>cc</sub><br>[°C] | ΔH <sub>cc</sub><br>[J·g <sub>PLA</sub> <sup>-1</sup> ] | T <sub>m</sub><br>[°C] | ΔH <sub>m</sub><br>[J·g <sub>PLA</sub> <sup>-1</sup> ] | σ<br>[S·cm <sup>-1</sup> ] |
|--------|-------------------------|---------------------------------------------------------|------------------------|--------------------------------------------------------|----------------------------|
| S4     | 120.3                   | 23.5                                                    | 151.3                  | 24.7                                                   | -                          |
| P2C    | 124.5                   | 18.8                                                    | 154.5                  | 18.9                                                   | (1±1)·10 <sup>-8</sup>     |
| P4C    | 122.4                   | 14.3                                                    | 154.0                  | 15.15                                                  | (3.7±1.4)·10 <sup>-8</sup> |
| P4.5C  | -                       | -                                                       | -                      | -                                                      | (1.5±0.8)·10 <sup>-7</sup> |
| P5C    | -                       | -                                                       | -                      | -                                                      | (2.8±1.5)·10 <sup>-7</sup> |
| P5.5C  | -                       | -                                                       | -                      | -                                                      | (2.1±1.3)·10 <sup>-1</sup> |
| P6C    | 124.7                   | 29.5                                                    | 153.1                  | 29.7                                                   | (5.1±1.1)·10 <sup>-1</sup> |
| P8C    | 123.8                   | 6.1                                                     | 154.4                  | 7.7                                                    | (9.8±1.6)·10 <sup>-1</sup> |
| P10C   | -                       | 1.4                                                     | 153.0                  | 1.1                                                    | 1.8±0.4                    |
| P15C   | -                       | -                                                       | -                      | -                                                      | 4.0±0.5                    |

Table S2.-DSC and electrical conductivity data results of MWCNT/PLA composites without additives.

### Optimization of plasticizer content

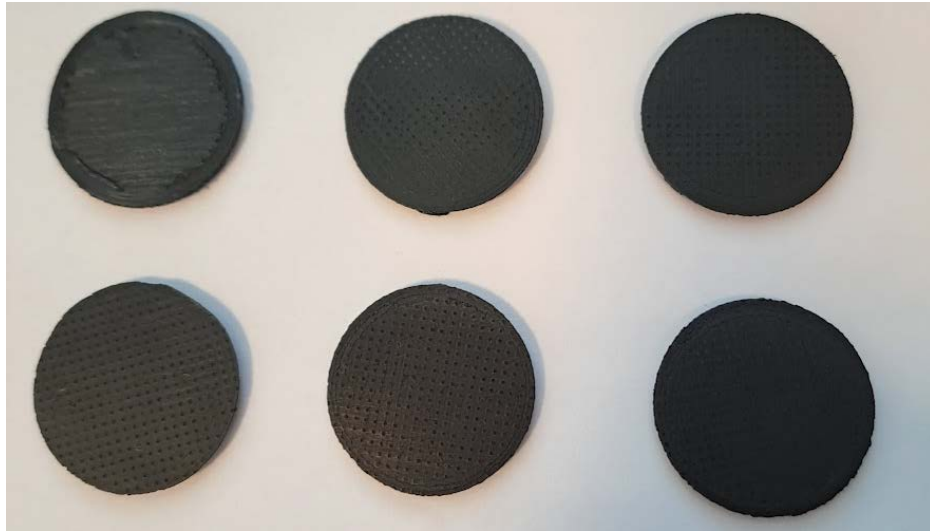

Figure S5-3D printed samples of PLA/MWCNT with (top) PEG and (bottom) lignin as additive. From left to right, they possess 1-3 wt.% of additive..

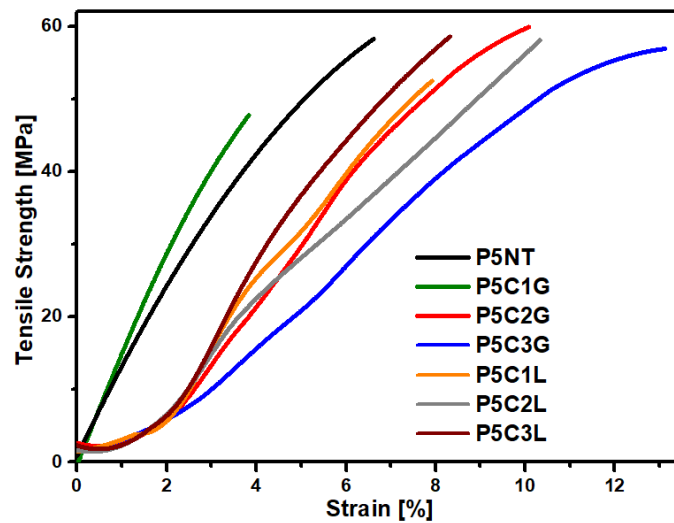

Figure S6-Stress-strain curves obtained from representative tensile tests of PLA/MWCNT/PEG composites with different amount of additives, A) lignin and B) PEG, and 5% of MWCNT.
